# Supplementary material for: Two-site occupancy induced the broad-band emission in the Ba4−x−ySryLa6O(SiO4)6:xEu2+ phosphor for white LEDs and anti-counterfeiting
Source: Royal Society of Chemistry journal article supplement (doi:10.1039/d1dt04059f), 2022-01-01
Supplement: d1dt04059f1.pdf [file d1dt04059f1.pdf]

# Supporting Information

## Multi-function Broad-Band Emission $\text{Ba}_{4-x}\text{Sr}_y\text{La}_6\text{O}(\text{SiO}_4)_6:x\text{Eu}^{2+}$ Phosphor for White LED, and Anti-counterfeiting

*Zhi Wang<sup>1</sup>, Xu Li<sup>1,2\*</sup>, Mingyang Li<sup>1</sup>, Jinxing Zhao<sup>1</sup>, Zhenyang Liu<sup>1</sup>, Dawei Wang<sup>3</sup>, Li Guan<sup>4\*</sup>, Fenghe Wang<sup>1,2\*</sup>*

<sup>1</sup> Hebei Key Laboratory of Optic-Electronic Information and Materials, College of Physics Science and Technology, Hebei University, Baoding 071002, PR China

<sup>2</sup> National-Local Joint Engineering Laboratory of New Energy Photoelectric Devices, Institute of Life Science and Green Development, Hebei University, Baoding, 071002, PR China

<sup>3</sup> Hebei Key Laboratory of Semiconductor Lighting and Display Critical Materials, Hebei Ledphor optoelectronics technology Co., LTD. Baoding, 071000, PR China

<sup>4</sup> Key Laboratory of High-precision Computation and Application of Quantum Field Theory of Hebei Province, Hebei University, Baoding 071002, PR China

---

\* Corresponding author: [lguan@hbu.edu.cn](mailto:lguan@hbu.edu.cn) (L. Guan); [fenghe\\_wang@hotmail.com](mailto:fenghe_wang@hotmail.com) (F. H. Wang); [lixcn@sina.com](mailto:lixcn@sina.com) (X. Li)

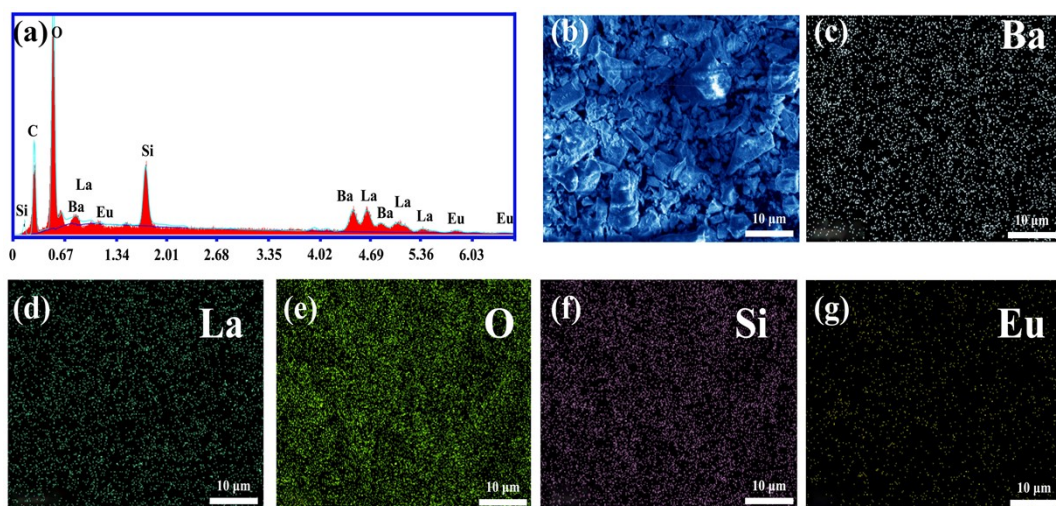

Fig.S1 (a) EDS images and (b) SEM image of BLOS:0.28Eu<sup>2+</sup>; (c-g) Elemental mapping images of Ba, La, O, Si, and Eu for the selected particle, respectively.

**Table S1. Main Crystallographic Parameters for Ba<sub>4-x</sub>La<sub>6</sub>O(SiO<sub>4</sub>)<sub>6</sub>:xEu<sup>2+</sup> ( $x = 0.016 - 0.48$ ) from the GSAS Program Rietveld Refinement**

| concentr              | $x=0.016$ | $x=0.04$  | $x=0.08$  | $x=0.28$  | $x=0.48$  |
|-----------------------|-----------|-----------|-----------|-----------|-----------|
| crystal               | hexagon   | hexagon   | hexagon   | hexagon   | hexagon   |
| space                 | $P 6_3/m$ |
| $a = b$ (Å)           | 9.807     | 9.8063    | 9.8051    | 9.7904    | 9.7795    |
| (Å)                   | 7.3454    | 7.3405    | 7.3388    | 7.3231    | 7.308     |
| $V$ (Å <sup>3</sup> ) | 611.82    | 611.316   | 611.021   | 607.893   | 605.285   |
| $2\theta$             | 10 - 75°  | 10 - 75°  | 10 - 75°  | 10 - 75°  | 10 - 75°  |
| $R_{wp}$ (%)          | 10.92     | 9.61      | 11.62     | 10.62     | 11.97     |
| $R_p$ (%)             | 6.95      | 6.49      | 7.15      | 6.75      | 7.52      |
| $CHI^2$               | 4.476     | 3.489     | 5.086     | 4.342     | 6.156     |

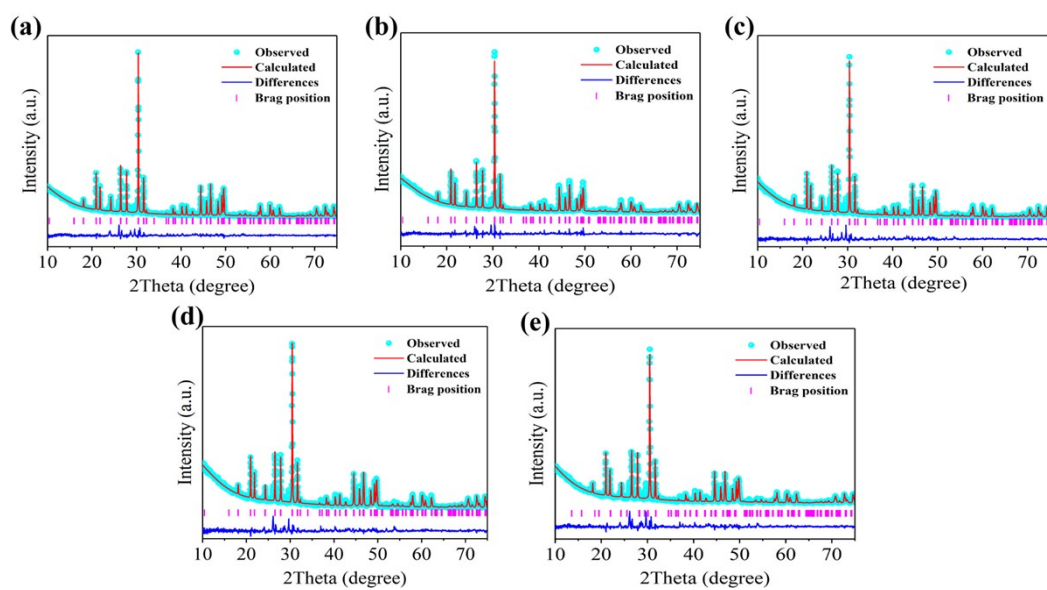

Fig.S2 (a–e) Rietveld refinement of the powder XRD profiles of BLOS: $x$ Eu ( $x = 0.016, 0.04, 0.08, 0.28, 0.48$ ), respectively.

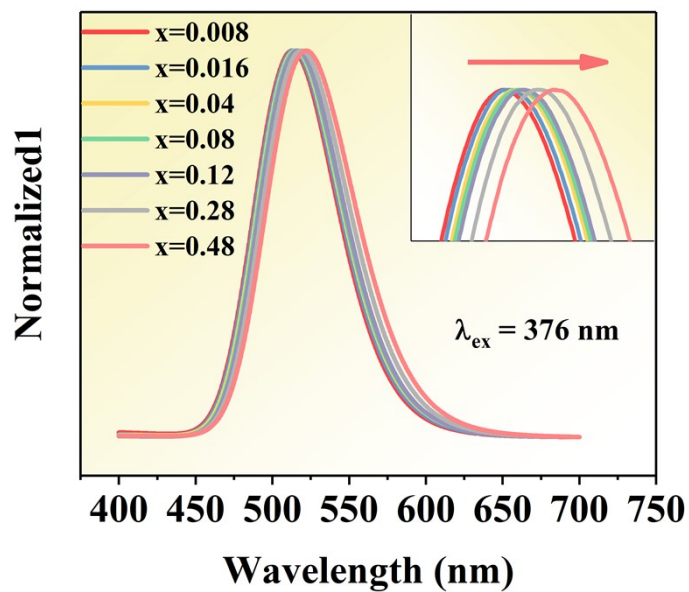

Fig.S3 Normalized PL spectrum of series phosphors BLOS:xEu.

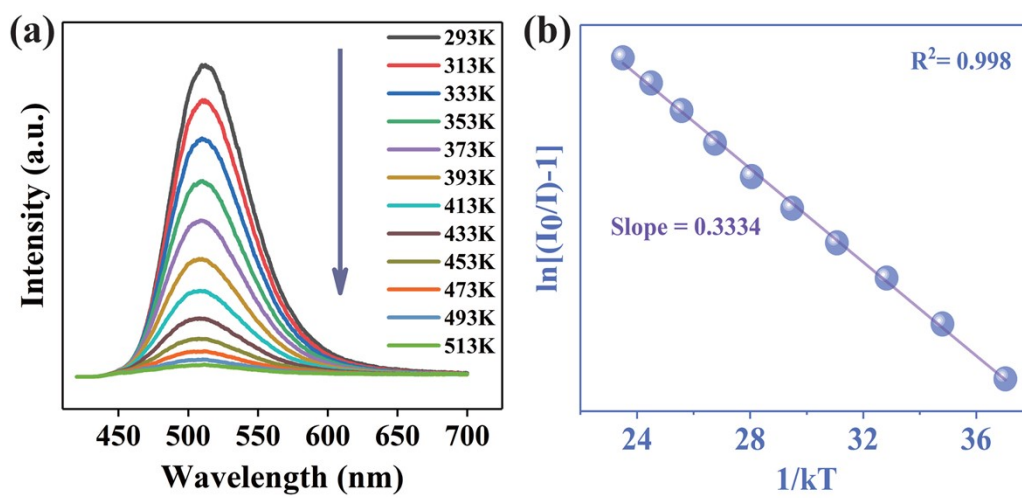

Fig.S4 (a) The temperature-dependent PL spectra of BLOS:0.08Eu phosphors at temperatures of 293–453 K ( $\lambda_{\text{ex}} = 376 \text{ nm}$ ); (b) The plot of  $\ln[I_0/I - 1]$  versus  $1/kT$  for BLOS:0.08Eu.

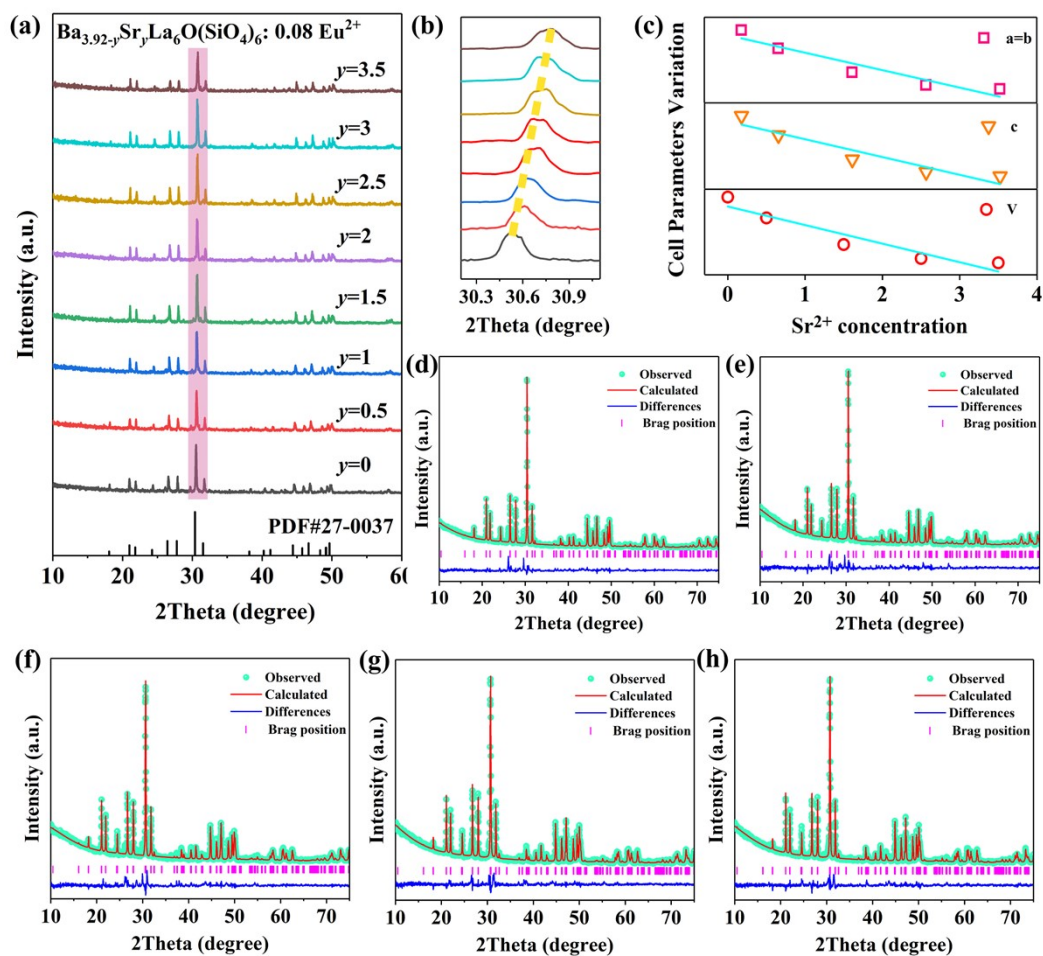

Fig.S5 (a) XRD patterns compared to the standard pattern of  $\text{Ba}_{3.92-y}\text{Sr}_y\text{La}_6\text{O}(\text{SiO}_4)_6:0.08\text{Eu}$  ( $y = 0\text{--}3.5$ ) and (b) view of the peak shift at  $30.1\text{--}31^\circ$ ; (c) evolution of lattice parameters ( $a$ ,  $b$ ,  $c$ ) and the unit cell volumes ( $V$ ) for  $\text{Ba}_{3.92-y}\text{Sr}_y\text{La}_6\text{O}(\text{SiO}_4)_6:0.08\text{Eu}$  ( $y = 0, 0.5, 1.5, 2.5, 3.5$ ); (d–h) Rietveld refinement of the powder XRD profiles of  $\text{Ba}_{3.92-y}\text{Sr}_y\text{La}_6\text{O}(\text{SiO}_4)_6:0.08\text{Eu}$ .

**Table S2. Main Crystallographic Parameters for  $\text{Ba}_{3.92-y}\text{Sr}_y\text{La}_6\text{O}(\text{SiO}_4)_6:0.08\text{Eu}^{2+}$  ( $y = 0 - 3.5$ ) from the GSAS Program Rietveld Refinement**

| concentration         | $y=0$     | $y=0.5$   | $y=1.5$   | $y=2.5$   | $y=3.5$   |
|-----------------------|-----------|-----------|-----------|-----------|-----------|
| crystal system        | hexagonal | hexagonal | hexagonal | hexagonal | hexagonal |
| space group           | $P 6_3/m$ |
| $a = b$ (Å)           | 9.8035    | 9.78      | 9.7493    | 9.7329    | 9.728     |
| $c$ (Å)               | 7.3405    | 7.3112    | 7.2743    | 7.2553    | 7.249     |
| $V$ (Å <sup>3</sup> ) | 610.971   | 605.615   | 598.777   | 595.209   | 594.088   |
| $2\theta$ interval    | 10 - 75°  | 10 - 75°  | 10 - 75°  | 10 - 75°  | 10 - 75°  |
| $R_{wp}$ (%)          | 10.69     | 10.08     | 10.14     | 8.54      | 7.95      |
| $R_p$ (%)             | 6.66      | 6.57      | 6.61      | 5.78      | 5.46      |
| CHI <sup>2</sup>      | 5.319     | 4.898     | 5.08      | 3.644     | 3.604     |

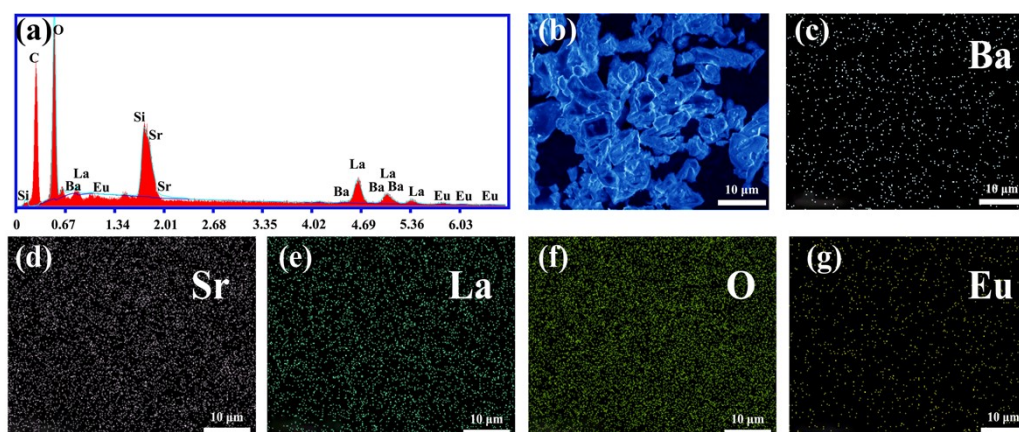

Fig.S6 (a) EDS images and (b) SEM image of  $\text{Ba}_{1.42}\text{Sr}_{2.5}\text{La}_6\text{O}(\text{SiO}_4)_6:0.08\text{Eu}$ ; (c-g) Elemental mapping images of Ba, Sr, La, O and Eu for the selected particle, respectively.

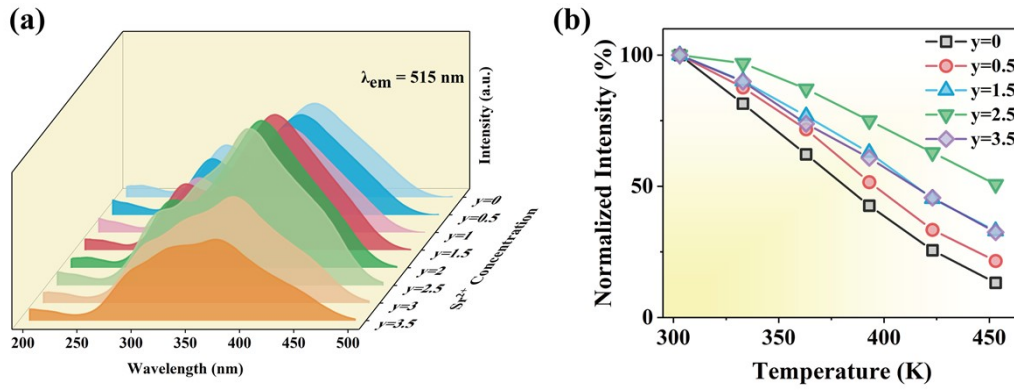

Fig.S7 (a) PL spectra of  $\text{Ba}_{3.92-y}\text{Sr}_y\text{La}_6\text{O}(\text{SiO}_4)_6:0.08\text{Eu}^{2+}$  ( $y = 0-3.5$ ) phosphor; (b) Normalized PL intensity of  $\text{Ba}_{3.92-y}\text{Sr}_y\text{La}_6\text{O}(\text{SiO}_4)_6:0.08\text{Eu}^{2+}$  ( $y = 0-3.5$ ) phosphor at different temperatures.

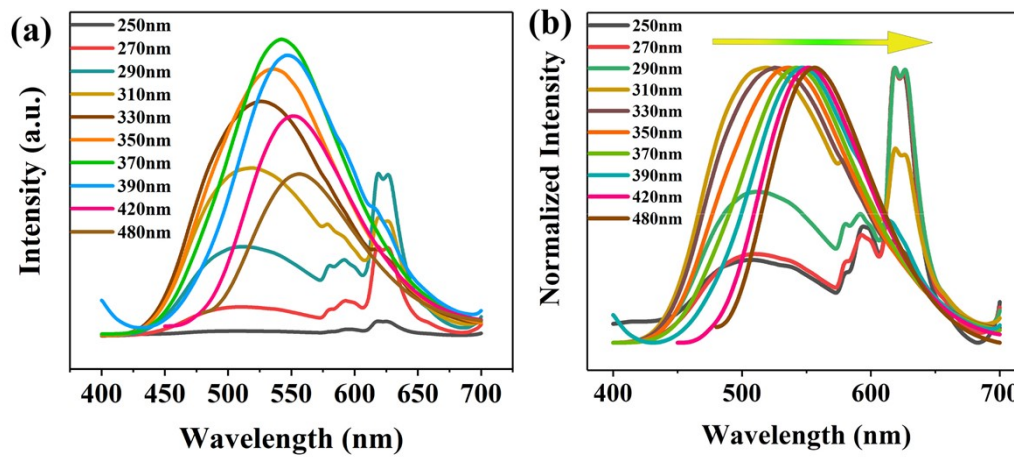

Fig.S8 (a) PL spectra of  $\text{Ba}_{0.42}\text{Sr}_{3.5}\text{La}_6\text{O}(\text{SiO}_4)_6:0.08\text{Eu}^{2+}$  phosphors at different excitation wavelengths; Normalized PL spectra of  $\text{Ba}_{0.42}\text{Sr}_{3.5}\text{La}_6\text{O}(\text{SiO}_4)_6:0.08\text{Eu}^{2+}$  phosphors at different excitation wavelengths.

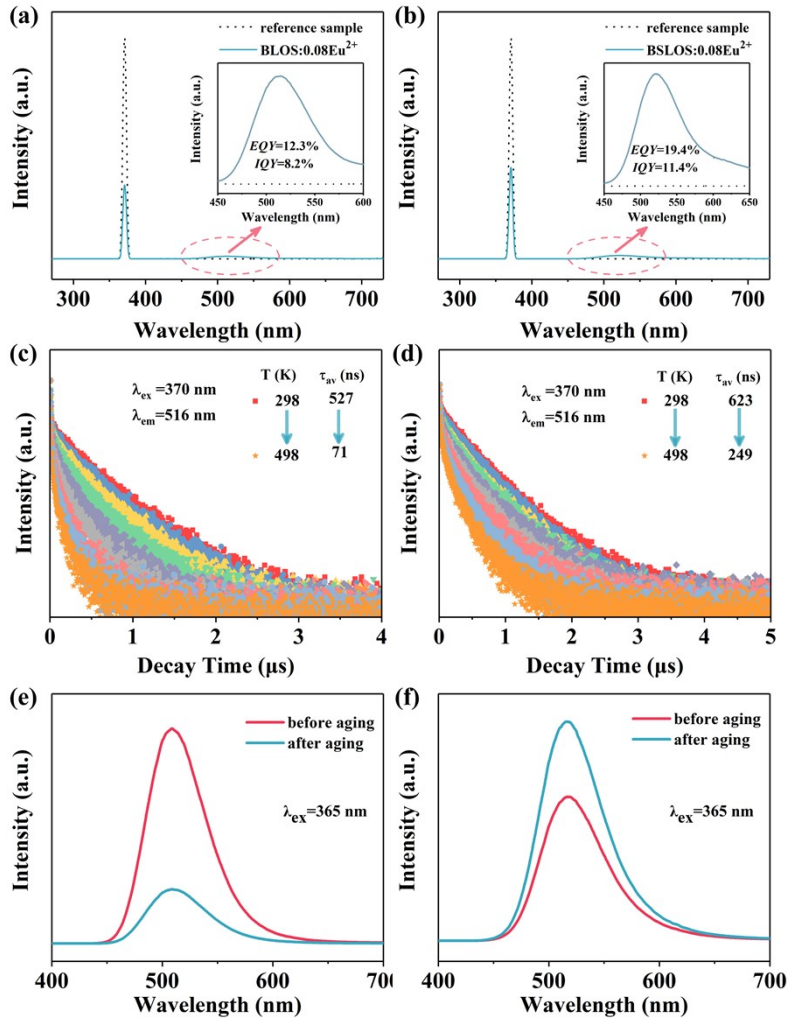

Fig.S9 The quantum efficiency of Ba<sub>3.92</sub>La<sub>6</sub>O(SiO<sub>4</sub>)<sub>6</sub>:0.08Eu phosphors(a) Ba<sub>0.42</sub>Sr<sub>3.5</sub>La<sub>6</sub>O(SiO<sub>4</sub>)<sub>6</sub>:0.08Eu phosphors(b); The excited-state lifetime dependence on temperature of Ba<sub>3.92</sub>La<sub>6</sub>O(SiO<sub>4</sub>)<sub>6</sub>:0.08Eu phosphors(c) Ba<sub>0.42</sub>Sr<sub>3.5</sub>La<sub>6</sub>O(SiO<sub>4</sub>)<sub>6</sub>:0.08Eu phosphors(d); The chemical stability of Ba<sub>3.92</sub>La<sub>6</sub>O(SiO<sub>4</sub>)<sub>6</sub>:0.08Eu phosphors(e) Ba<sub>0.42</sub>Sr<sub>3.5</sub>La<sub>6</sub>O(SiO<sub>4</sub>)<sub>6</sub>:0.08Eu phosphors(f).



Table S3 The chemical stability of  $\text{Ba}_{3.92}\text{La}_6\text{O}(\text{SiO}_4)_6:0.08\text{Eu}$  phosphors  $\text{Ba}_{0.42}\text{Sr}_{3.5}\text{La}_6\text{O}(\text{SiO}_4)_6:0.08\text{Eu}$  phosphors.

| □                           | $\text{Ba}_{3.92}\text{La}_6\text{O}(\text{SiO}_4)_6:0.08\text{Eu}$ |             | $\text{Ba}_{3.92}\text{La}_6\text{O}(\text{SiO}_4)_6:0.08\text{Eu}$ |             |
|-----------------------------|---------------------------------------------------------------------|-------------|---------------------------------------------------------------------|-------------|
|                             | before aging                                                        | after aging | before aging                                                        | after aging |
| <b>Normalized intensity</b> | 1                                                                   | 0.255       | 1                                                                   | 0.67        |
| <b>FWHM (nm)</b>            | 62.14                                                               | 62.91       | 66.27                                                               | 67.3        |
| <b>CIE</b>                  | (0.19,0.58)                                                         | (0.19,0.59) | (0.25,0.61)                                                         | (0.24,0.61) |
| <b>X at max height (nm)</b> | 514.2                                                               | 516.2       | 524.8                                                               | 526.2       |
